# Supplementary material for: Lithium storage performance and mechanism of nano-sized Ti2InC MAX phase
Source: Royal Society of Chemistry journal article supplement (doi:10.1039/d2nh00489e), 2022-12-21
Supplement: d2nh00489e1.pdf [file d2nh00489e1.pdf]

### Supporting information

Lithium storage performance and mechanism of nano-sized  $\text{Ti}_2\text{InC}$  MAX phase  
Xueqin Xu<sup>1</sup>, Dawei Sha<sup>1</sup>, Zhihua Tian<sup>1</sup>, Fushuo Wu<sup>1</sup>, Wei Zheng<sup>2\*</sup>, Li Yang<sup>1</sup>,  
Shengyu Xie<sup>1</sup>, Peigen Zhang<sup>1\*</sup>, ZhengMing Sun<sup>1\*</sup>

<sup>1</sup> Jiangsu Key Laboratory of Advanced Metallic Materials, School of Materials  
Science and Engineering, Southeast University, Nanjing 211189, P. R. China

<sup>2</sup> School of Chemistry and Chemical Engineering, Southeast University, Nanjing  
211189, P. R. China

\* Corresponding author: [zhengwei22@seu.edu.cn](mailto:zhengwei22@seu.edu.cn), [zhpeigen@seu.edu.cn](mailto:zhpeigen@seu.edu.cn),  
[zmsun@seu.edu.cn](mailto:zmsun@seu.edu.cn)

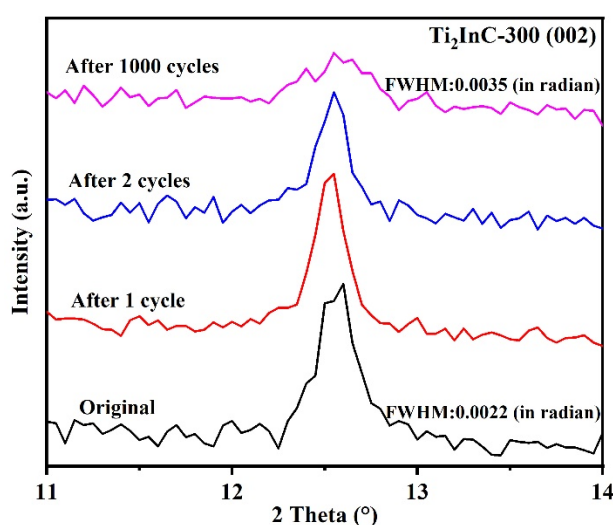

Figure S1 *ex-situ* XRD for  $\text{Ti}_2\text{InC-300}$  electrodes after different cycles

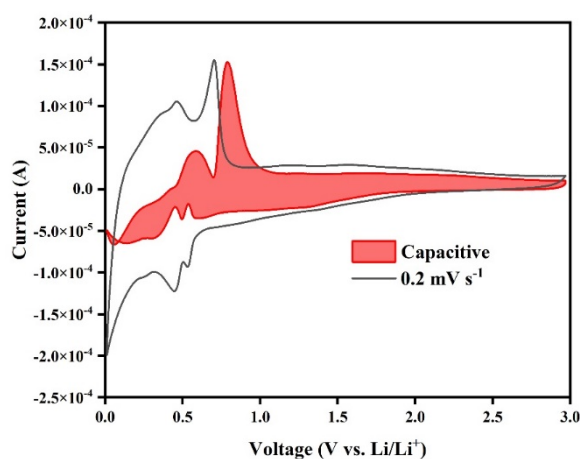

Figure S2 Capacitive and diffusion-controlled currents of  $\text{Ti}_2\text{InC-300}$  electrode initially at  $0.2 \text{ mV s}^{-1}$

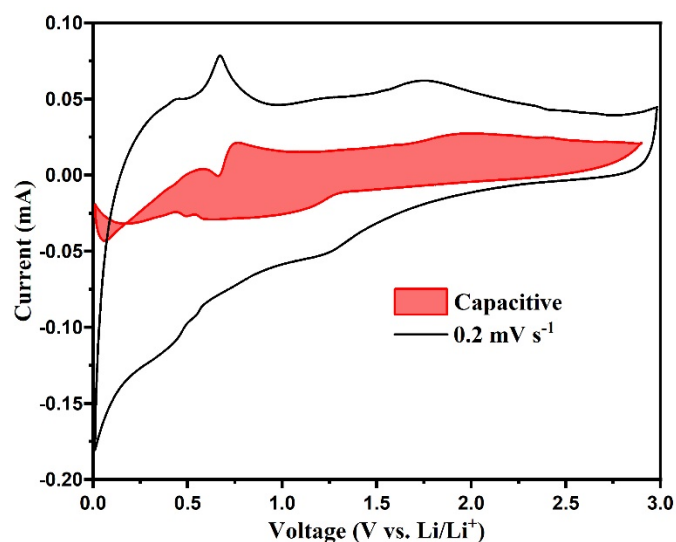

Figure S3 Capacitive and diffusion-controlled currents in  $\text{Ti}_2\text{InC-300}$  electrode after 500 cycles at  $0.2 \text{ mV s}^{-1}$

Table 1 diffusion-controlled contribution ratios of  $\text{Ti}_2\text{InC-300}$  electrode before and after cycles

| Scanning rate<br>( $\text{mV s}^{-1}$ ) | 0.2    | 0.4    | 0.6    | 0.8    | 1.0    |
|-----------------------------------------|--------|--------|--------|--------|--------|
| Initially                               | 0.4859 | 0.4528 | 0.3945 | 0.3504 | 0.2994 |
| After 500<br>cycles                     | 0.7324 | 0.6857 | 0.6420 | 0.5977 | 0.5496 |
